# Supplementary material for: Oropharyngeal Candidiasis among Egyptian COVID-19 Patients: Clinical Characteristics, Species Identification, and Antifungal Susceptibility, with Disease Severity and Fungal Coinfection Prediction Models
Source: MDPI journal article supplement (doi:10.3390/diagnostics12071719), 2022-07-15
Supplement: s1 [file s1]

## Biofilm

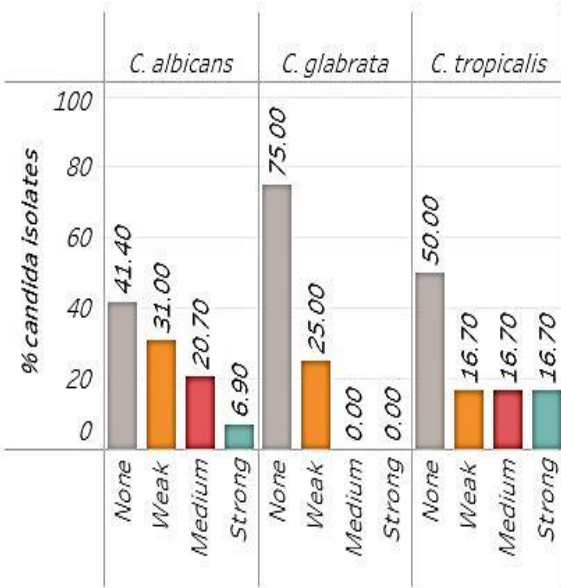

## Phospholipase

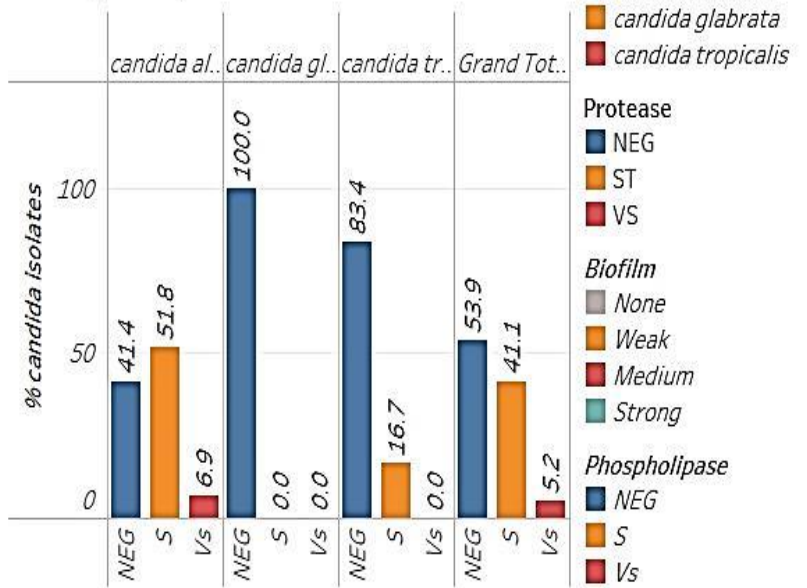

## Heamolysis

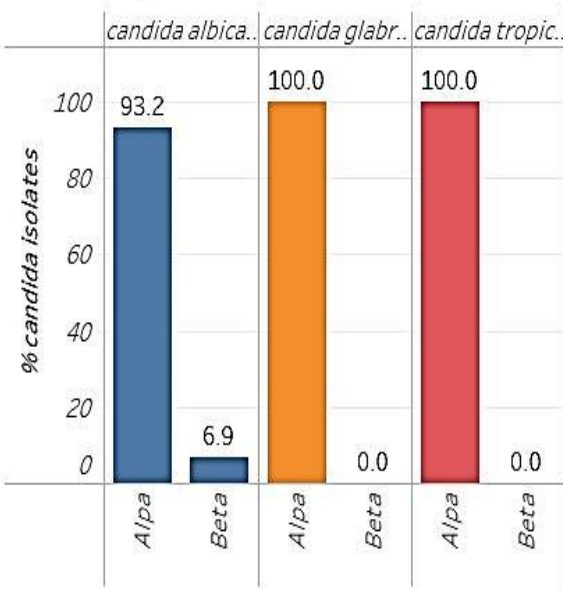

## Protease

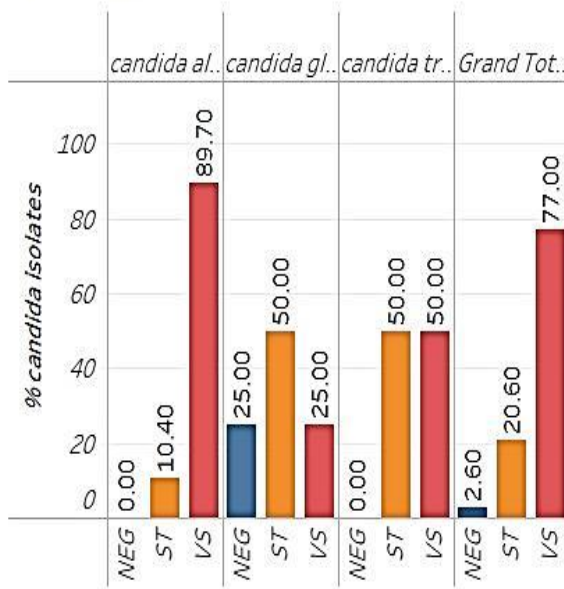

Supplementary Figure S1: Activity of different virulence factors among different *Candida* species. The figure illustrates the levels of biofilm, phospholipase, hemolytic, and protease activities of *Candida* species. (Vs): indicates very strong, (s): strong and (neg): negative.
